# Supplementary material
Source: publisher figshare collection journal article supplement (https://asha.figshare.com/articles/dataset/_/25492804)
Supplement: Supplementary file 1 [file 1]

## **Supplemental Material S1. Adult diagnostic scripts: Case 1.**

### **Case 1**

**Only relay the information which the student audiologists asks you about.**

#### Biographical Information

Name: Jenna

Age: 25 years old

Gender: Female

Race: Coloured

Language: Afrikaans

Residence: Auckland Park

#### Activities

- I complete daily chores
- I'm a cashier at spar
- I DJ at parties when I'm asked to-once in a while.

#### Social History (family and friends):

- I'm single
- I have a two year old son

#### Medical:

- I'm HIV positive
- I sometimes can't feel the right side of my lip. I also wonder if it is droopy. I'm not sure if I had a stroke. This started a year ago.
- I also have severe headaches. They can last for an hour.
- I'm not on any medication

#### Audiological History:

- I think I'm deaf in my right ear
- As child, pus used to come out of my right ear all of time. Sho, it used to smell very bad. Even, now there is like white pus that smells very bad that leaks from my right ear
- Since a year ago, my right ear was very painful.
- Also, I hear a doof sound in my right ear. It is a constant sound.
- I do sometimes feel dizzy when I'm walking
- I have not consulted with an ENT or an audiologist before

#### Assessment

- During assessment responds as follows:
- Left ear: hearing within normal limits

- Right ear: poor responses across the frequency range; **NB BC should be poor at 2KHz**

### **Feedback**

- During the feedback giving ask if you will need surgery
- Ask if you need to wear a hearing aid because you are concerned about the cosmetic appeal (i.e. you think it looks unattractive)
