# Supplementary material
Source: publisher figshare collection journal article supplement (https://asha.figshare.com/articles/dataset/_/25492804)
Supplement: Supplementary file 2 [file 1]

## **Supplemental Material S2. Adult diagnostic scripts: Case 2.**

### **Case 2**

**Only relay the information which the student audiologists asks you about.**

#### Biographical Information

Name: Ms. Daniels

Age: 45 years old

Gender: Female

Race: Coloured

Language: Afrikaans

Residence: Eldorado Park

#### Activities

- I assist at the daily soup kitchen at my church.
- I complete daily chores e.g. wash dishes

#### Social History (family and friends):

- My husband passed away five years ago
- I reside with my son who is unemployed. He can be abusive and I think he may be on drugs because I caught him stealing money from purse
- My daughter works as a cashier at Dischem, she supports me financially

#### Medical:

- I have high blood pressure
- Recently, I've noticed that my smile falls to one side.
- I sweat at night-too much. I don't if I'm getting early onset of menopause.
- And my heart beats fast-doof doof
- Oh and don't even talk about the headaches. Two days ago, I was carrying a tray full of bowls of soup and I got this unbearable headache. I couldn't take it and I ended up dropping the bowls.

#### Audiological History:

- I have difficulty hearing soft sounds, like tap dripping.
- I think that my right ear is worse
- My right ear is very painful.
- I also experience a constant doof doof sound in my right ear. It doesn't change in loudness. It affects my concentration as I can't help but focus on it, as I focus on it all of the time.
- I do experience a spinning sensation and nausea when I wake up in the morning
- I have not consulted with an ENT or an audiologist before

### **Assessment**

- During assessment responds as follows:
- Start off by responding inconsistently
- Left ear: hearing within normal limits
- Right ear: poor responses across the low to mid frequencies
- Pitch matching 250Hz
- Loudness discomfort level: Average between 70-80dB
- Minimum masking level: 10dB
- Residual inhibition: state that there was no difference after 1 minute

### **Counselling**

- During the counselling ask if you will need surgery
- Ask if you need to wear a hearing aid because you are concerned about the cosmetic appeal (i.e. you think it looks unattractive)
